# Supplementary material
Source: publisher site journal article supplement (https://www.spandidos-publications.com/5269/downloadSupplementary)
Supplement: Supplementary file 1 [file downloadSupplementary]

## Sheet: High_(Low+Medium)_diffLab
Table SV. lncRNAs dysregulated in the high risk group
	logFC	AveExpr	t	P.Value
SLC44A4	-1.06538	4.98648	-8.07803	7.95302e-15
SFTA3	-0.909616	4.40614	-5.71698	2.13181e-08
SFTA1P	-0.843236	3.57567	-4.57478	6.37936e-06
AC008268.1	-0.751048	1.36895	-4.87805	1.55267e-06
RP11-66N24.6	-0.744905	1.84033	-5.14485	4.21427e-07
HAGLR	-0.740439	2.8428	-5.34816	1.50235e-07
RP11-469H8.6	-0.632627	1.05594	-5.62585	3.48713e-08
RP11-462G2.1	-0.627243	1.95555	-2.91547	0.0037526
PTCSC3	-0.5629	1.35218	-5.11789	4.82018e-07
LINC00261	-0.551891	1.46374	-4.7076	3.46713e-06
LHFPL3-AS2	-0.550696	1.21984	-4.6183	5.23223e-06
RP11-760H22.2	-0.543288	2.19632	-6.38366	4.82439e-10
RP11-259K15.2	-0.522213	1.44522	-4.65898	4.34143e-06
KIFC1	0.72341	2.81138	7.30658	1.51307e-12
LINC00973	0.765211	0.646556	6.64592	9.95298e-11
CTD-2510F5.4	0.826977	2.4982	8.47654	4.5851e-16
